# Supplementary material for: Luminescent carbon quantum dots derived from syzygium cumini seeds with endogenous anti-oxidant and cytotoxic potency including in vitro photoluminescence and live cell imaging
Source: Royal Society of Chemistry journal article supplement (doi:10.1039/d4nj00040d), 2024-01-01
Supplement: d4nj00040d1.pdf [file d4nj00040d1.pdf]

# Luminescent Carbon Quantum Dots Derived from *Syzygium cumini* Seeds with Endogenous Anti-Oxidant and Cytotoxic Potency including *in vitro* Photoluminescence and Live Cell Imaging

Tanazparveen M. Danawala<sup>a</sup>, Komal A. Trivedi<sup>a</sup>, Urvi M. Lad<sup>a</sup>, Bhumi N. Desai<sup>b</sup>, Subodh Kumar Singh<sup>b</sup>, Devesh H. Suthar<sup>b</sup>, Chetan K. Modi<sup>a,\*</sup>

<sup>a</sup>Applied Chemistry Department, Faculty of Technology & Engineering, The Maharaja Sayajirao University of Baroda, Vadodara, Gujarat-390001, India

<sup>b</sup>Department of Biochemistry, Faculty of Science, The Maharaja Sayajirao University of Baroda, Vadodara, Gujarat-390001, India

## Supplementary Information

### Results and Discussion

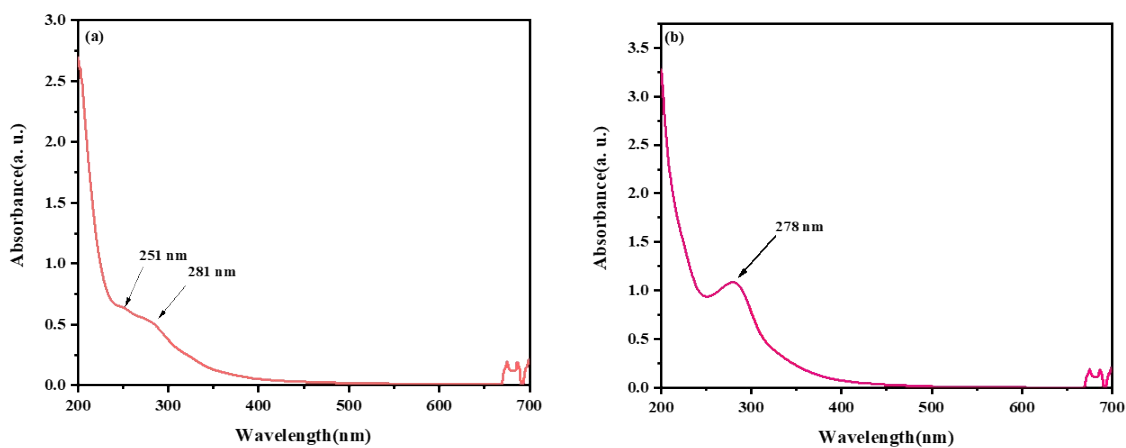

**Figure S1.** UV- Vis spectra of CQDs prepared from (a) JG (b) Garlic cloves (G)

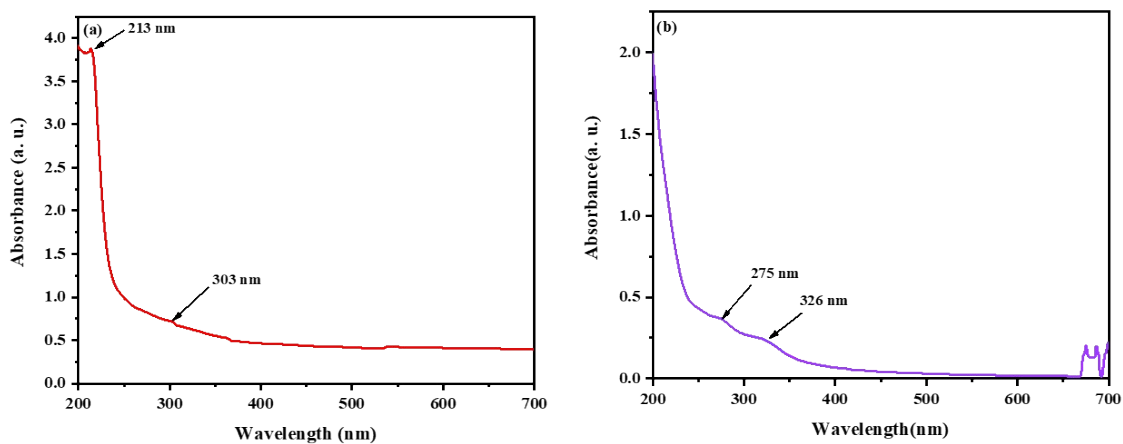

**Figure S2.** UV- Vis spectra of CQDs prepared from (a) JS (b) Soybean seeds (S)

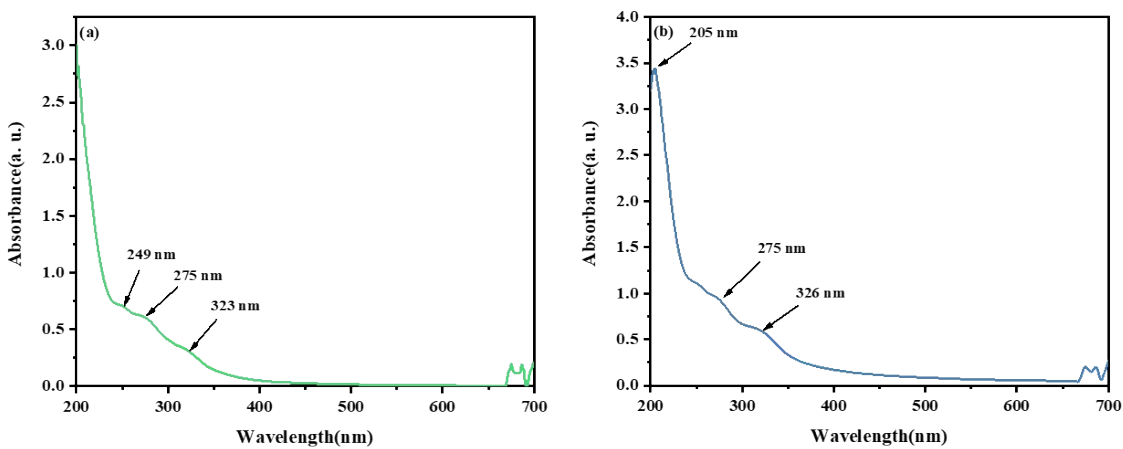

**Figure S3.** UV- Vis spectra of CQDs prepared from (a) JK (b) Kalonji seeds (K)

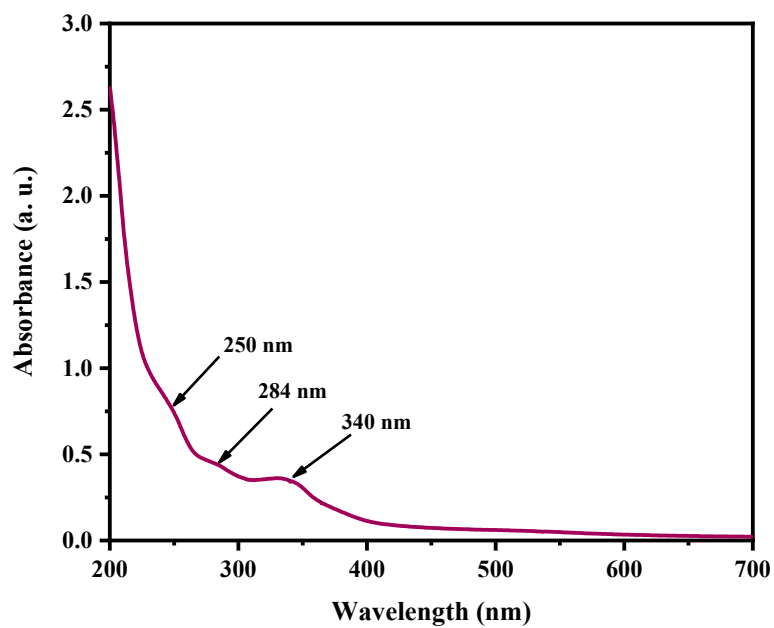

**Figure S4.** UV-Vis spectrum of JF CQDs

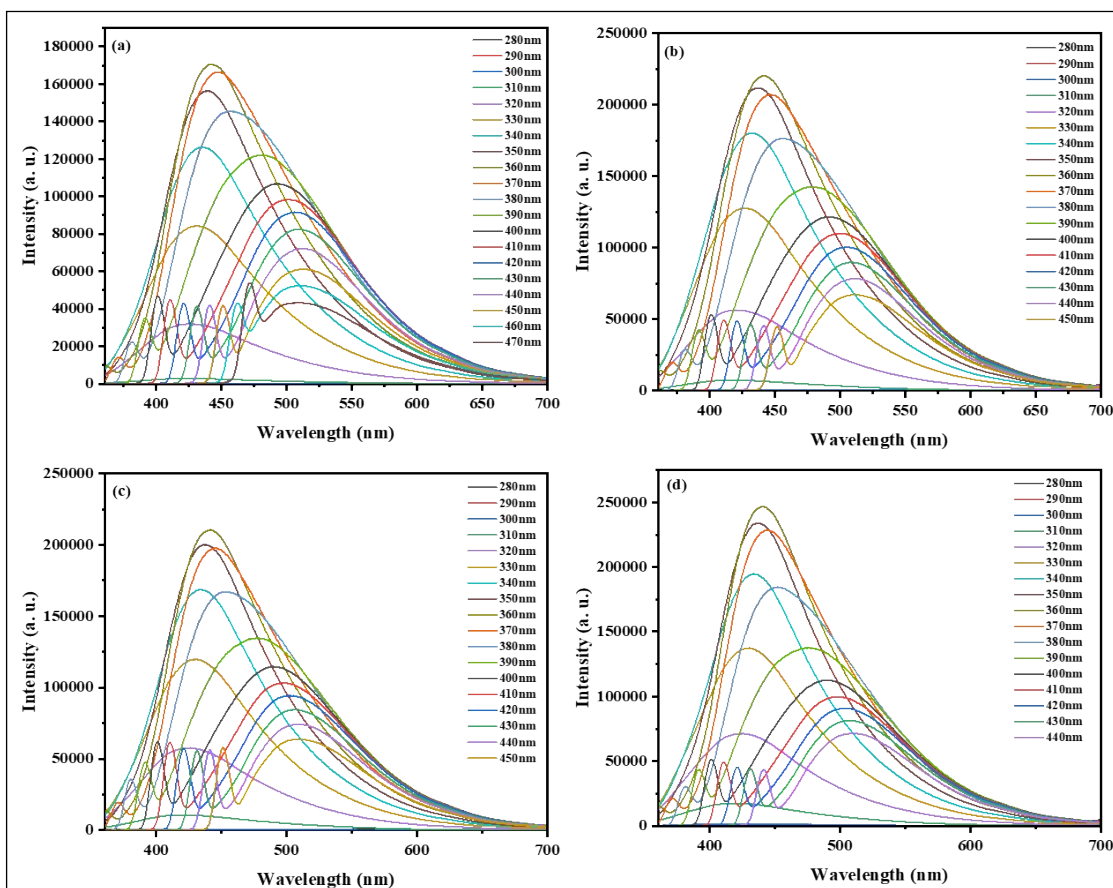

**Figure S4.** Photoluminescence (PL) spectra of CQDs prepared from jamun seeds at various time frames (a) 4 h (b) 6 h (c) 8 h (d) 10 h

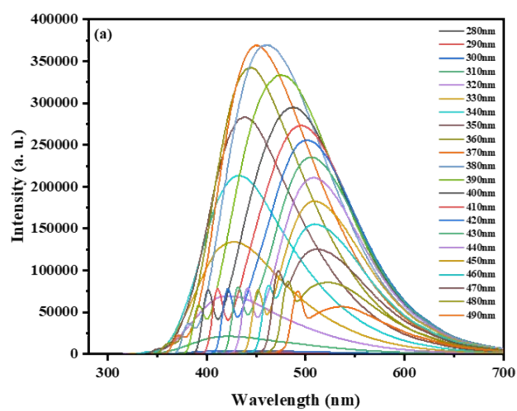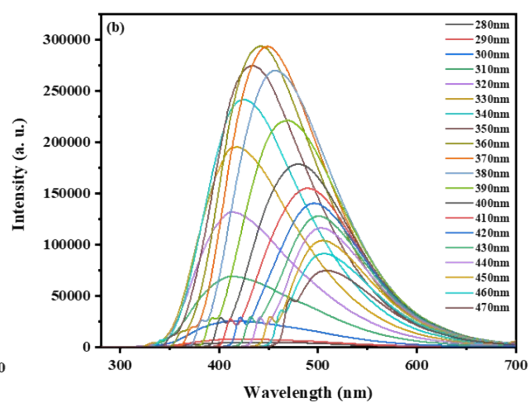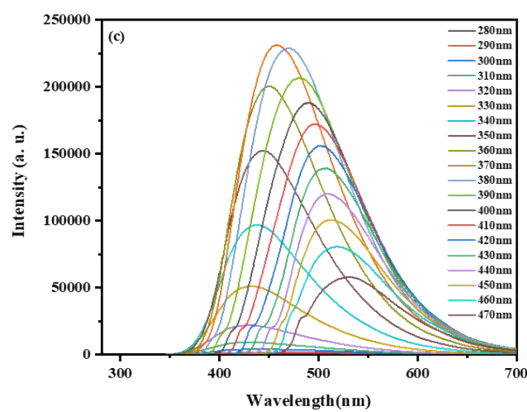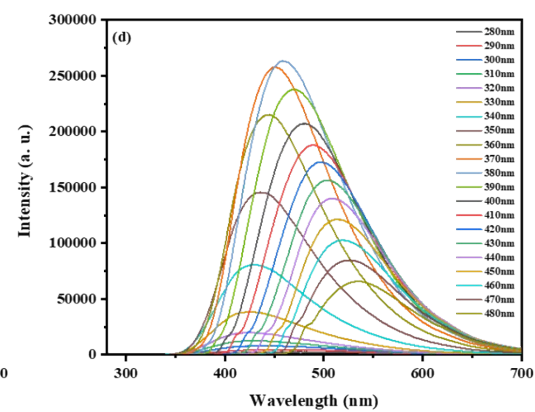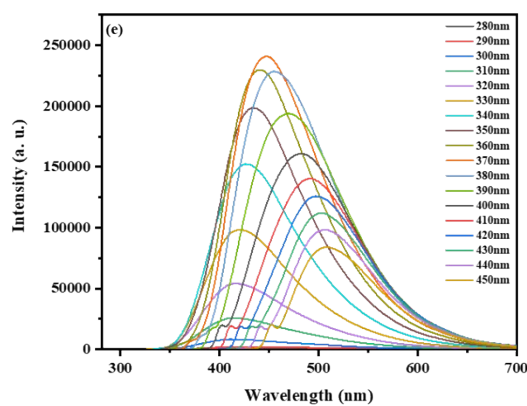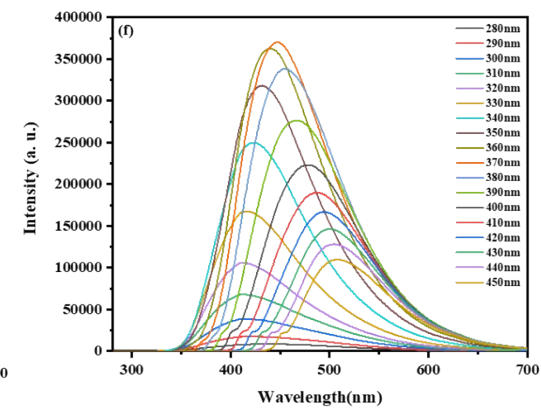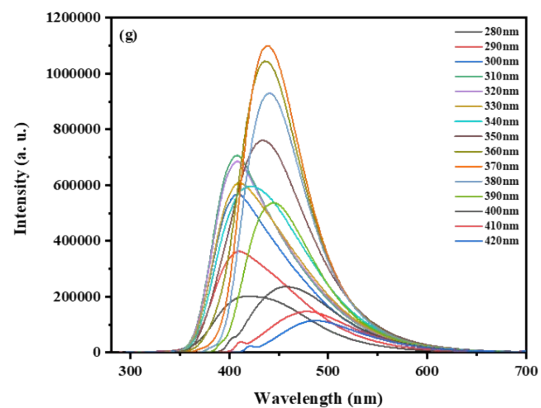

**Figure S5.** Photoluminescence (PL) spectra of (a) JG (b) G (c) JS (d) S (e) JK (f) K (g) JF

**Table S1.** Fluorescence wavelength maxima and its excitation wavelength for different CQDs

| <b>Sample Code</b> | <b><math>\lambda_{\text{max}}</math> (nm)</b> | <b>Excitation wavelength (nm)</b> |
|--------------------|-----------------------------------------------|-----------------------------------|
| JG                 | 460                                           | 380                               |
| G                  | 441.5                                         | 360                               |
| JS                 | 457.5                                         | 370                               |
| S                  | 458.5                                         | 380                               |
| JK                 | 447.5                                         | 370                               |
| K                  | 448                                           | 370                               |
| JF                 | 438                                           | 370                               |

**Table S2.** Quantum yield of CQDs

| <b>Sample</b> | <b>Quantum yield (%)</b> |
|---------------|--------------------------|
| JG            | 27                       |
| G             | 17                       |
| JS            | 24.7                     |
| S             | 19.8                     |
| JK            | 30                       |
| K             | 23                       |
| JF            | 50.74                    |

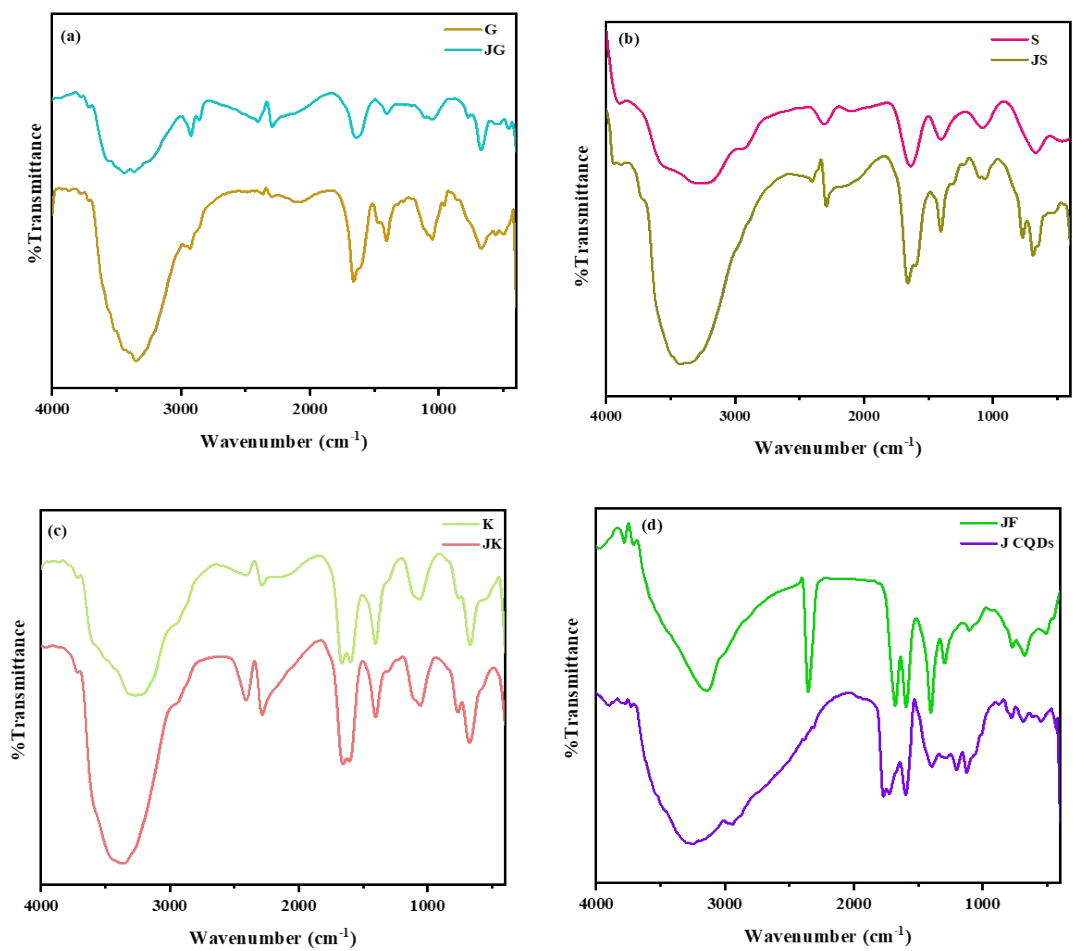

**Figure S6.** FT-IR spectrums of CQDs of (a) G & JG, (b) S & JS, (c) K & JK, (d) JF & J CQDs

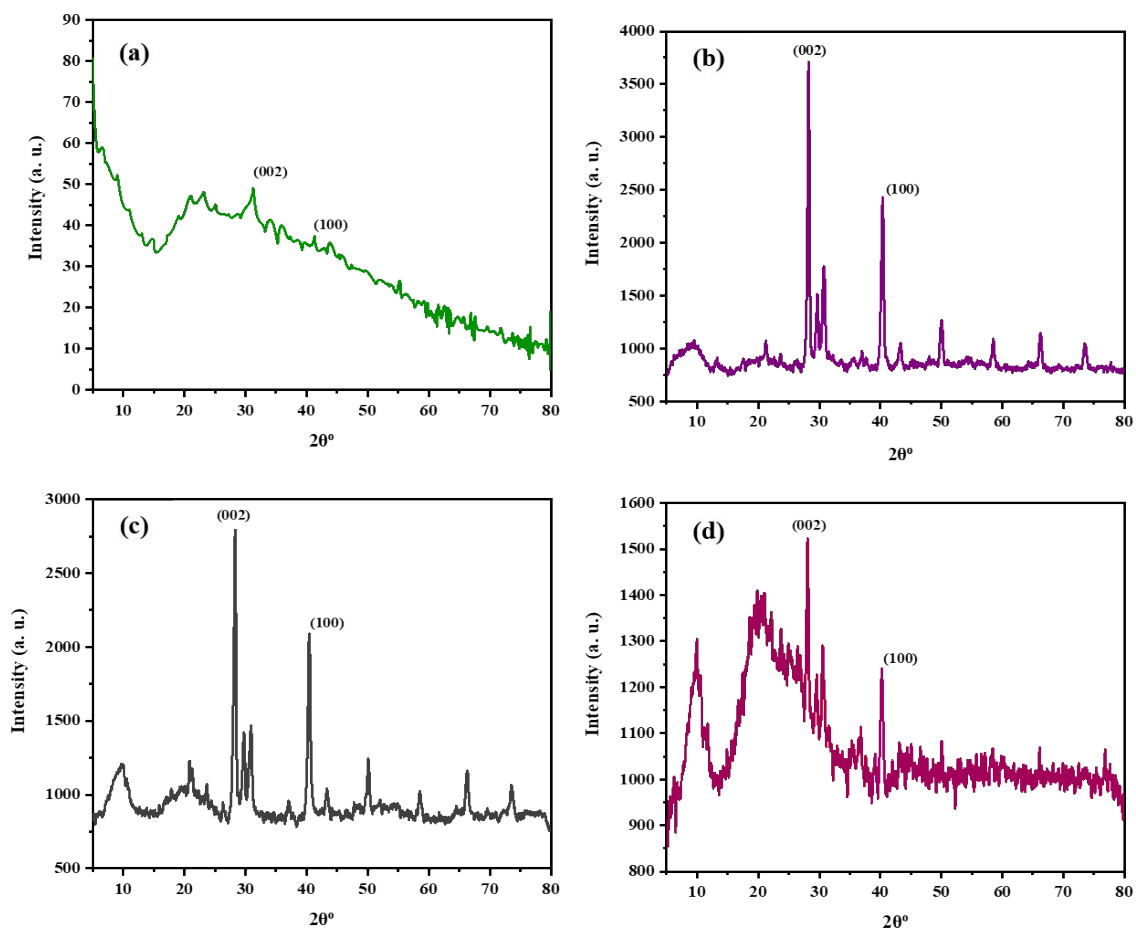

**Figure S7.** X-ray diffraction pattern of CQDs (a) JG (b) JS (c) JK (d) JK

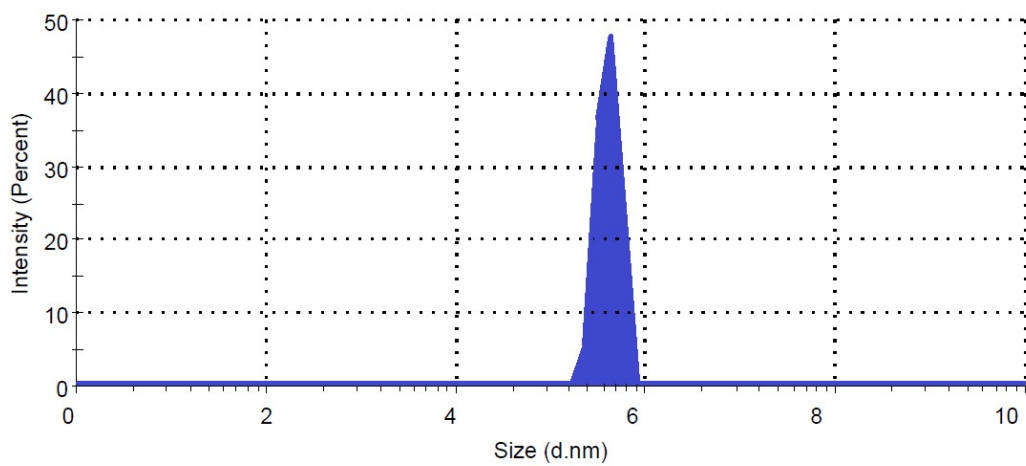



**Figure S8.** Dynamic light scattering (DLS) size distribution of carbon quantum dots

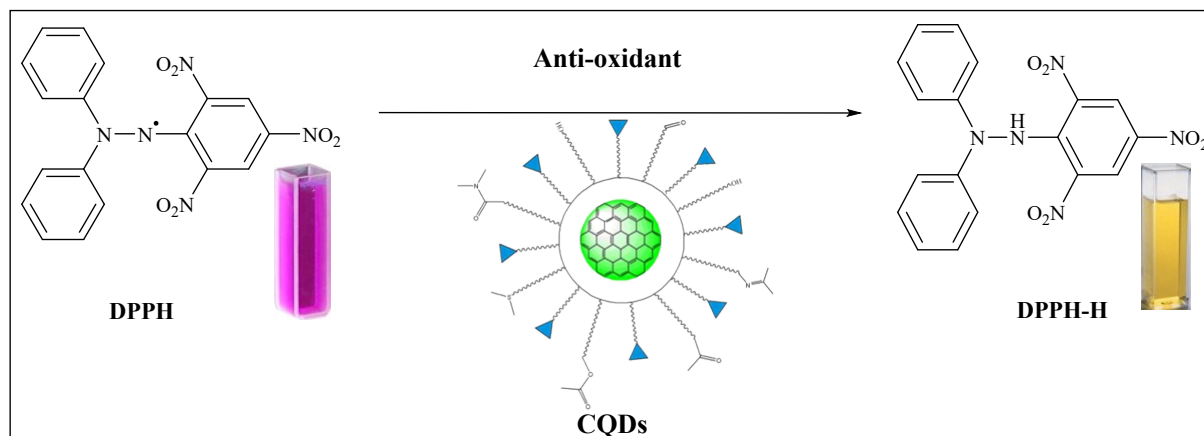

**Figure S9.** Mechanism of radical scavenging for prepared CQDs

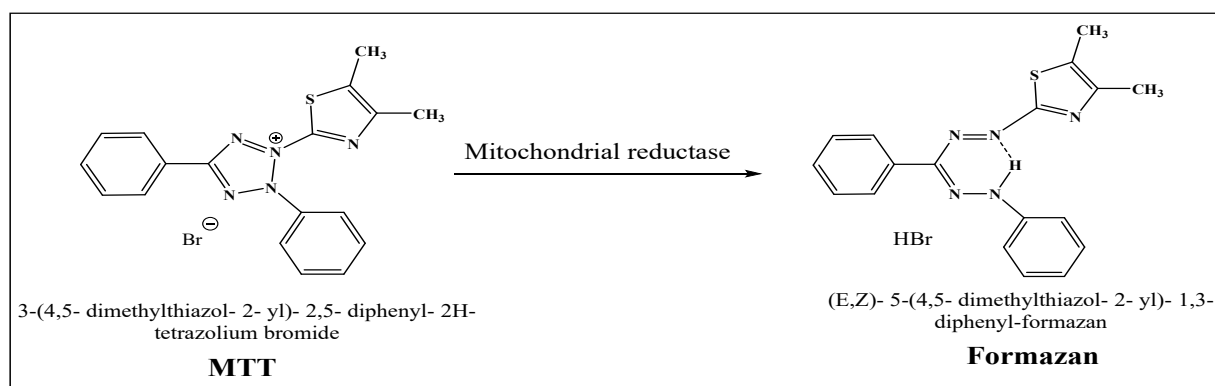

**Figure S10.** Mechanism of evaluation of Cytotoxicity in JF

**Table S3.** Cytotoxicity data of DOX in HeLa cell Line measured at 570 nm

| Compound Name | HeLa Cell line         |            |       |              |
|---------------|------------------------|------------|-------|--------------|
|               | Conc. $\mu\text{g/mL}$ | OD @ 570nm |       | % Inhibition |
|               |                        | A1         | A2    |              |
| Control       | 0                      | 0.801      | 0.826 | 0            |
| DOX           | 7.81                   | 0.463      | 0.458 | 21.76        |
|               | 15.62                  | 0.471      | 0.488 | 24.59        |
|               | 31.25                  | 0.502      | 0.512 | 32.76        |

---

|      |       |       |       |
|------|-------|-------|-------|
| 62.5 | 0.54  | 0.516 | 35.10 |
| 125  | 0.566 | 0.528 | 37.68 |
| 250  | 0.593 | 0.634 | 41.06 |
| 500  | 0.61  | 0.663 | 43.39 |

---

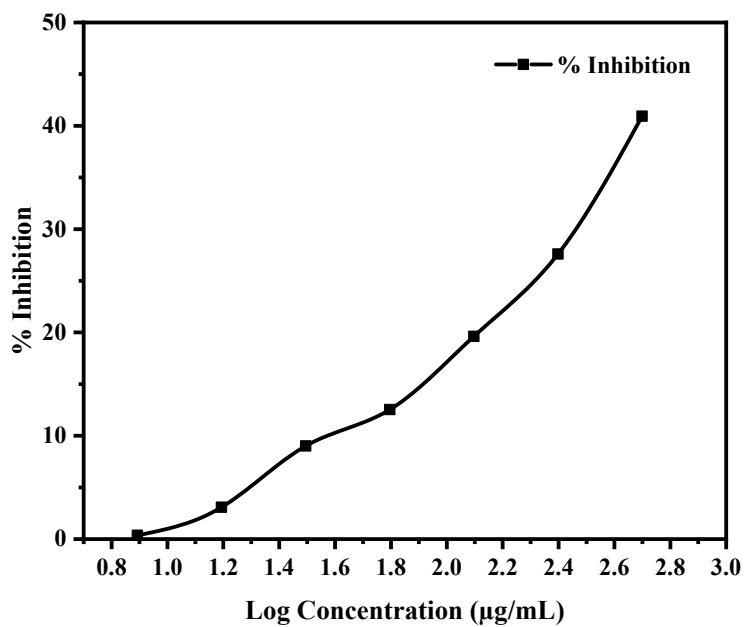

**Figure S11.** Dose-response curve of HeLa cells against concentration of DOX
